# Supplementary material for: Identification of major QTLs for yield-related traits with improved genetic map in wheat
Source: Front Plant Sci. 2023 Mar 17;14:1138696. doi: 10.3389/fpls.2023.1138696 (PMC10063875; doi:10.3389/fpls.2023.1138696)
Supplement: Supplementary file 4 [file Table_4.xlsx]

## Sheet: Sheet2
Table S4 High-confidence annotated genes located in the confident interval of QTkw-1B.2
TranID	Pfam-IDs-(Description)	Interpro-IDs-(Description)	NR	Swissprot	AtID	At
TraesCS1B02G395900.1	PF00917: MATH domain	IPR008974: TRAF-like; IPR002083: MATH/TRAF domain	VAH22317.1 unnamed protein product [Triticum turgidum subsp. durum]	--	AT3G17380.1
TraesCS1B02G396000.1	PF00447: HSF-type DNA-binding	IPR000232: Heat shock factor (HSF)-type, DNA-binding; IPR027725: Heat shock transcription factor family; IPR036388: Winged helix-like DNA-binding domain superfamily; IPR036390: Winged helix DNA-binding domain superfamily	VAH22318.1 unnamed protein product [Triticum turgidum subsp. durum]	sp|Q338B0|HFA2C_ORYSJ Heat stress transcription factor A-2c OS=Oryza sativa subsp. japonica OX=39947 GN=HSFA2C PE=1 SV=2	AT3G22830.1	member of Heat Stress Transcription Factor (Hsf) family
TraesCS1B02G396100.1	PF11326: Protein of unknown function (DUF3128)	IPR021475: Protein of unknown function DUF3128	VAH22323.1 unnamed protein product [Triticum turgidum subsp. durum]	--	--	--
TraesCS1B02G396200.1	PF03079: ARD/ARD' family	IPR014710: RmlC-like jelly roll fold; IPR004313: Acireductone dioxygenase ARD family; IPR011051: RmlC-like cupin domain superfamily; IPR027496: 1,2-dihydroxy-3-keto-5-methylthiopentene dioxygenase, eukaryotes	AIM18897.1 acireductone dioxygenase [Triticum aestivum]	sp|Q7XEJ5|MTND4_ORYSJ 1,2-dihydroxy-3-keto-5-methylthiopentene dioxygenase 4 OS=Oryza sativa subsp. japonica OX=39947 GN=ARD4 PE=2 SV=1	AT5G43850.1
TraesCS1B02G396300.1	PF00265: Thymidine kinase	IPR001267: Thymidine kinase; IPR020633: Thymidine kinase, conserved site; IPR027417: P-loop containing nucleoside triphosphate hydrolase	VAH22324.1 unnamed protein product [Triticum turgidum subsp. durum]	sp|O81263|KITH_ORYSJ Thymidine kinase OS=Oryza sativa subsp. japonica OX=39947 GN=TK PE=2 SV=2	AT3G07800.1
TraesCS1B02G396400.1	PF08387: FBD	IPR032675: Leucine-rich repeat domain superfamily; IPR006566: FBD domain; IPR036047: F-box-like domain superfamily	VAH22328.1 unnamed protein product [Triticum turgidum subsp. durum]	sp|Q6NKX3|FDL14_ARATH F-box/FBD/LRR-repeat protein At2g04230 OS=Arabidopsis thaliana OX=3702 GN=At2g04230 PE=2 SV=1	AT2G04230.1
TraesCS1B02G396500.1	--	--	VAH82020.1 unnamed protein product [Triticum turgidum subsp. durum]	--	--	--
TraesCS1B02G396600.1	PF01798: snoRNA binding domain, fibrillarin; PF09785: Prp31 C terminal domain	IPR002687: Nop domain; IPR036070: Nop domain superfamily; IPR042239: Nop, C-terminal domain; IPR012976: NOSIC; IPR027105: U4/U6 small nuclear ribonucleoprotein Prp31; IPR029012: Helix hairpin bin domain superfamily; IPR019175: Prp31 C-terminal	VAH22332.1 unnamed protein product [Triticum turgidum subsp. durum]	sp|Q8RXN6|PRP31_ARATH U4/U6 small nuclear ribonucleoprotein Prp31 homolog OS=Arabidopsis thaliana OX=3702 GN=PRP31 PE=1 SV=1	AT1G60170.1
TraesCS1B02G396700.1	PF01715: IPP transferase	IPR039657: Dimethylallyltransferase; IPR018022: IPP transferase; IPR027417: P-loop containing nucleoside triphosphate hydrolase	XP_020176006.1 adenylate isopentenyltransferase-like [Aegilops tauschii subsp. tauschii]	sp|Q5GHF7|IPT_HUMLU Adenylate isopentenyltransferase OS=Humulus lupulus OX=3486 PE=1 SV=1	AT3G19160.1	Encodes cytokinin synthase.
TraesCS1B02G396800.2	PF01985: CRS1 / YhbY (CRM) domain	IPR001890: RNA-binding, CRM domain; IPR035920: YhbY-like superfamily	VAH22339.1 unnamed protein product [Triticum turgidum subsp. durum]	sp|A7XN92|CFM3_MAIZE CRM-domain containing factor CFM3, chloroplastic/mitochondrial OS=Zea mays OX=4577 GN=CFM3 PE=1 SV=1	AT3G18390.1
TraesCS1B02G396900.1	-	IPR037476: PCH1	XP_020176001.1 uncharacterized protein LOC109761598 [Aegilops tauschii subsp. tauschii]	--	--	--
TraesCS1B02G397000.1	PF00931: NB-ARC domain	IPR002182: NB-ARC; IPR032675: Leucine-rich repeat domain superfamily; IPR027417: P-loop containing nucleoside triphosphate hydrolase	XP_020200557.1 disease resistance RPP13-like protein 4 [Aegilops tauschii subsp. tauschii]	sp|Q8W474|DRL7_ARATH Probable disease resistance protein At1g58390 OS=Arabidopsis thaliana OX=3702 GN=At1g58390 PE=2 SV=4	AT1G58390.1
TraesCS1B02G397100.1	PF00931: NB-ARC domain; PF18052: Rx N-terminal domain	IPR041118: Rx, N-terminal; IPR002182: NB-ARC; IPR038005: Virus X resistance protein-like, coiled-coil domain; IPR027417: P-loop containing nucleoside triphosphate hydrolase	VAH22345.1 unnamed protein product [Triticum turgidum subsp. durum]	sp|Q7XBQ9|RGA2_SOLBU Disease resistance protein RGA2 OS=Solanum bulbocastanum OX=147425 GN=RGA2 PE=1 SV=1	AT3G50950.2
TraesCS1B02G397200.1	--	--	VAH22349.1 unnamed protein product [Triticum turgidum subsp. durum]	--	--	--
TraesCS1B02G397300.1	--	--	VAH22346.1 unnamed protein product [Triticum turgidum subsp. durum]	--	--	--
TraesCS1B02G397400.1	--	--	VAH22346.1 unnamed protein product [Triticum turgidum subsp. durum]	--	--	--
TraesCS1B02G397500.1	--	--	VAH22347.1 unnamed protein product [Triticum turgidum subsp. durum]	--	--	--
TraesCS1B02G397600.1	--	--	VAH22348.1 unnamed protein product [Triticum turgidum subsp. durum]	--	--	--
TraesCS1B02G397700.1	--	--	VAH22347.1 unnamed protein product [Triticum turgidum subsp. durum]	--	--	--
TraesCS1B02G397800.1	--	--	VAH22347.1 unnamed protein product [Triticum turgidum subsp. durum]	--	--	--
TraesCS1B02G397900.1	--	--	VAH22349.1 unnamed protein product [Triticum turgidum subsp. durum]	--	--	--
TraesCS1B02G398000.1	--	--	VAH22350.1 unnamed protein product [Triticum turgidum subsp. durum]	--	--	--
TraesCS1B02G398100.1	PF04408: Helicase associated domain (HA2)	IPR007502: Helicase-associated domain; IPR014001: Helicase superfamily 1/2, ATP-binding domain; IPR001650: Helicase, C-terminal; IPR027417: P-loop containing nucleoside triphosphate hydrolase	VAH22352.1 unnamed protein product [Triticum turgidum subsp. durum]	sp|Q9LZQ9|DEAH2_ARATH Probable pre-mRNA-splicing factor ATP-dependent RNA helicase DEAH2 OS=Arabidopsis thaliana OX=3702 GN=At3g62310 PE=2 SV=1	AT3G62310.1
