# Supplementary material for: Identification of major QTLs for yield-related traits with improved genetic map in wheat
Source: Front Plant Sci. 2023 Mar 17;14:1138696. doi: 10.3389/fpls.2023.1138696 (PMC10063875; doi:10.3389/fpls.2023.1138696)
Supplement: Supplementary file 7 [file Table_7.xlsx]

## Sheet: Sheet1
Table S7 High-confidence annotated genes located in the confident interval of QTss-7A.3
TranID	Pfam-IDs-(Description)	Interpro-IDs-(Description)	NR	Swissprot	AtID	At
TraesCS7A02G480900.1	--	--	XP_020154611.1 F-box protein At5g07610-like [Aegilops tauschii subsp. tauschii]	--	--	--
TraesCS7A02G481000.1	-	IPR011990: Tetratricopeptide-like helical domain superfamily	EMS59976.1 hypothetical protein TRIUR3_26542 [Triticum urartu]	--	AT4G21705.1
TraesCS7A02G481100.1	PF00646: F-box domain	IPR036047: F-box-like domain superfamily; IPR001810: F-box domain	VAI80323.1 unnamed protein product [Triticum turgidum subsp. durum]	sp|Q9FLS0|FB253_ARATH F-box protein At5g07610 OS=Arabidopsis thaliana OX=3702 GN=At5g07610 PE=2 SV=1	AT5G07610.1
TraesCS7A02G481200.1	PF00646: F-box domain	IPR036047: F-box-like domain superfamily; IPR001810: F-box domain	VAI92397.1 unnamed protein product [Triticum turgidum subsp. durum]	sp|Q9FLS0|FB253_ARATH F-box protein At5g07610 OS=Arabidopsis thaliana OX=3702 GN=At5g07610 PE=2 SV=1	AT5G07610.1
TraesCS7A02G481300.1	--	--	EMS46521.1 hypothetical protein TRIUR3_33563 [Triticum urartu]	--	--	--
TraesCS7A02G481400.2	-	IPR001349: Cytochrome c oxidase, subunit VIa; IPR036418: Cytochrome c oxidase, subunit VIa superfamily	EMS62770.1 hypothetical protein TRIUR3_33892 [Triticum urartu]	sp|Q9T070|COX6A_ARATH Cytochrome c oxidase subunit 6a, mitochondrial OS=Arabidopsis thaliana OX=3702 GN=COX6A PE=3 SV=1	AT4G37830.1
TraesCS7A02G481500.1	PF01546: Peptidase family M20/M25/M40; PF07687: Peptidase dimerisation domain	IPR002933: Peptidase M20; IPR001261: ArgE/DapE/ACY1/CPG2/YscS, conserved site; IPR010158: Amidase, carbamoylase-type; IPR011650: Peptidase M20, dimerisation domain; IPR036264: Bacterial exopeptidase dimerisation domain	VAI80333.1 unnamed protein product [Triticum turgidum subsp. durum]	sp|Q655X8|AAH_ORYSJ Probable allantoate deiminase OS=Oryza sativa subsp. japonica OX=39947 GN=AAH PE=1 SV=1	AT4G20070.1	The gene encoding Arabidopsis thaliana Allantoate Amidohydrolase (AtAAH)which catalyzes the allantoate deiminase reaction (EC 3.5.3.9)is expressed in all parts of the plant being consistent with a function in purine turnover in Arabidopsis.
TraesCS7A02G481600.1	PF12937: F-box-like	IPR036047: F-box-like domain superfamily; IPR011043: Galactose oxidase/kelch, beta-propeller; IPR001810: F-box domain	QDG00477.1 abnormal panicle organization 1 [Triticum aestivum]	sp|Q655Y0|APO1_ORYSJ Protein ABERRANT PANICLE ORGANIZATION 1 OS=Oryza sativa subsp. japonica OX=39947 GN=APO1 PE=1 SV=1	AT1G30950.1	Required for the proper identity of the floral meristem. Involved in establishing the whorled pattern of floral organs, in the control of specification of the floral meristem, and in the activation of APETALA3 and PISTILLATA. UFO is found at the AP3 promoter in a LFY-dependent manner, suggesting that it works with LFY to regulate AP3 expression. UFO may also promote the ubiquitylation of LFY.
TraesCS7A02G481700.1	PF07983: X8 domain	IPR012946: X8 domain	VAI80335.1 unnamed protein product [Triticum turgidum subsp. durum]	sp|Q94CD8|E134_ARATH Glucan endo-1,3-beta-glucosidase 4 OS=Arabidopsis thaliana OX=3702 GN=At3g13560 PE=2 SV=1	AT5G67460.1
TraesCS7A02G481800.1	PF05739: SNARE domain; PF00804: Syntaxin	IPR000727: Target SNARE coiled-coil homology domain; IPR010989: SNARE; IPR006011: Syntaxin, N-terminal domain; IPR006012: Syntaxin/epimorphin, conserved site	VAI80338.1 unnamed protein product [Triticum turgidum subsp. durum]	sp|Q8VZU2|SY132_ARATH Syntaxin-132 OS=Arabidopsis thaliana OX=3702 GN=SYP132 PE=1 SV=1	AT5G08080.3	member of SYP13 Gene Family
TraesCS7A02G481900.1	PF04535: Domain of unknown function (DUF588)	IPR006702: Casparian strip membrane protein domain	VAI80339.1 unnamed protein product [Triticum turgidum subsp. durum]	sp|B8AYU8|CSPLS_ORYSI CASP-like protein 5B2 OS=Oryza sativa subsp. indica OX=39946 GN=OsI_20198 PE=3 SV=1	--	--
TraesCS7A02G482000.1	PF00702: haloacid dehalogenase-like hydrolase	IPR011949: HAD-superfamily hydrolase, subfamily IA, REG-2-like; IPR036412: HAD-like superfamily; IPR023214: HAD superfamily; IPR006439: HAD hydrolase, subfamily IA	EMS67856.1 Haloacid dehalogenase-like hydrolase domain-containing protein 3 [Triticum urartu]	sp|Q9CYW4|HDHD3_MOUSE Haloacid dehalogenase-like hydrolase domain-containing protein 3 OS=Mus musculus OX=10090 GN=Hdhd3 PE=1 SV=1	AT5G44730.2
TraesCS7A02G482100.1	PF01554: MatE	IPR002528: Multi antimicrobial extrusion protein	VAI80341.1 unnamed protein product [Triticum turgidum subsp. durum]	sp|F4JH46|DTX34_ARATH Protein DETOXIFICATION 34 OS=Arabidopsis thaliana OX=3702 GN=DTX34 PE=2 SV=1	AT4G00350.1
TraesCS7A02G482200.1	PF03381: LEM3 (ligand-effect modulator 3) family / CDC50 family	IPR005045: CDC50/LEM3 family	VAI80346.1 unnamed protein product [Triticum turgidum subsp. durum]	sp|Q9SLK2|ALIS3_ARATH ALA-interacting subunit 3 OS=Arabidopsis thaliana OX=3702 GN=ALIS3 PE=1 SV=1	AT1G54320.1
TraesCS7A02G482300.1	PF00450: Serine carboxypeptidase	IPR029058: Alpha/Beta hydrolase fold; IPR018202: Serine carboxypeptidase, serine active site; IPR001563: Peptidase S10, serine carboxypeptidase	VAI80351.1 unnamed protein product [Triticum turgidum subsp. durum]	sp|Q67Y83|SCP51_ARATH Serine carboxypeptidase-like 51 OS=Arabidopsis thaliana OX=3702 GN=SCPL51 PE=2 SV=2	AT2G27920.1
TraesCS7A02G482400.1	PF14547: Hydrophobic seed protein	IPR027923: Hydrophobic seed protein domain; IPR036312: Bifunctional inhibitor/plant lipid transfer protein/seed storage helical domain superfamily; IPR016140: Bifunctional inhibitor/plant lipid transfer protein/seed storage helical domain	VAI80354.1 unnamed protein product [Triticum turgidum subsp. durum]	sp|Q01595|CCDP_MAIZE Cortical cell-delineating protein OS=Zea mays OX=4577 PE=2 SV=1	AT2G45180.1
TraesCS7A02G482500.1	PF12776: Myb/SANT-like DNA-binding domain	IPR024752: Myb/SANT-like domain	VAI54716.1 unnamed protein product [Triticum turgidum subsp. durum]	--	--	--
TraesCS7A02G482600.1	PF14547: Hydrophobic seed protein	IPR036312: Bifunctional inhibitor/plant lipid transfer protein/seed storage helical domain superfamily; IPR027923: Hydrophobic seed protein domain; IPR016140: Bifunctional inhibitor/plant lipid transfer protein/seed storage helical domain	EMS68038.1 Cortical cell-delineating protein [Triticum urartu]	sp|Q01595|CCDP_MAIZE Cortical cell-delineating protein OS=Zea mays OX=4577 PE=2 SV=1	AT1G12090.1	extensin-like protein (ELP)
TraesCS7A02G482700.1	--	--	KXG29683.1 hypothetical protein SORBI_3004G075400 [Sorghum bicolor]	--	--	--
TraesCS7A02G482800.1	PF14547: Hydrophobic seed protein	IPR036312: Bifunctional inhibitor/plant lipid transfer protein/seed storage helical domain superfamily; IPR027923: Hydrophobic seed protein domain; IPR016140: Bifunctional inhibitor/plant lipid transfer protein/seed storage helical domain	VAI80354.1 unnamed protein product [Triticum turgidum subsp. durum]	sp|Q01595|CCDP_MAIZE Cortical cell-delineating protein OS=Zea mays OX=4577 PE=2 SV=1	AT2G45180.1
TraesCS7A02G482900.1	PF14547: Hydrophobic seed protein	IPR036312: Bifunctional inhibitor/plant lipid transfer protein/seed storage helical domain superfamily; IPR027923: Hydrophobic seed protein domain; IPR016140: Bifunctional inhibitor/plant lipid transfer protein/seed storage helical domain	VAI80355.1 unnamed protein product [Triticum turgidum subsp. durum]	sp|Q01595|CCDP_MAIZE Cortical cell-delineating protein OS=Zea mays OX=4577 PE=2 SV=1	AT2G45180.1
TraesCS7A02G483000.1	PF14547: Hydrophobic seed protein	IPR027923: Hydrophobic seed protein domain; IPR036312: Bifunctional inhibitor/plant lipid transfer protein/seed storage helical domain superfamily; IPR016140: Bifunctional inhibitor/plant lipid transfer protein/seed storage helical domain	EMS64339.1 Cortical cell-delineating protein [Triticum urartu]	sp|Q01595|CCDP_MAIZE Cortical cell-delineating protein OS=Zea mays OX=4577 PE=2 SV=1	AT1G12090.1	extensin-like protein (ELP)
TraesCS7A02G483100.1	PF00249: Myb-like DNA-binding domain; PF14379: MYB-CC type transfactor, LHEQLE motif	IPR001005: SANT/Myb domain; IPR009057: Homeobox-like domain superfamily; IPR017930: Myb domain; IPR025756: MYB-CC type transcription factor, LHEQLE-containing domain; IPR006447: Myb domain, plants	VAI80356.1 unnamed protein product [Triticum turgidum subsp. durum]	sp|Q9SAK5|APL_ARATH Myb family transcription factor APL OS=Arabidopsis thaliana OX=3702 GN=APL PE=1 SV=2	AT1G79430.2	Encodes gene product that is required for several aspects of phloem development in the root: (1) the specific divisions organizing the phloem pole, (2) sieve element differentiation and (3) the expression of a companion-specific gene. Mutant has a defect in the organization of phloem poles in the root. apl seedlings have a short, determinate root with only occasional lateral branches.
TraesCS7A02G483200.1	PF10502: Signal peptidase, peptidase S26	IPR000223: Peptidase S26A, signal peptidase I; IPR019756: Peptidase S26A, signal peptidase I, serine active site; IPR019757: Peptidase S26A, signal peptidase I, lysine active site; IPR036286: LexA/Signal peptidase-like superfamily; IPR019533: Peptidase S26; IPR019758: Peptidase S26A, signal peptidase I, conserved site	VAI92439.1 unnamed protein product [Triticum turgidum subsp. durum]	sp|Q8H0W1|PLSP1_ARATH Chloroplast processing peptidase OS=Arabidopsis thaliana OX=3702 GN=PLSP1 PE=2 SV=2	AT3G24590.1	Encodes a signal peptidase Plsp1 (plastidic type I signal peptidase 1). Required for thylakoid development. Functions in the maturation of the 75-kD component of the translocon at the outer envelope membrane of chloroplasts and oxygen evolving complex subunit 33 (OE33).
TraesCS7A02G483300.1	PF00646: F-box domain	IPR036047: F-box-like domain superfamily; IPR001810: F-box domain	VAI80364.1 unnamed protein product [Triticum turgidum subsp. durum]	--	--	--
TraesCS7A02G483400.1	--	--	VAI80368.1 unnamed protein product [Triticum turgidum subsp. durum]	--	--	--
TraesCS7A02G483500.1	--	--	VAI80371.1 unnamed protein product [Triticum turgidum subsp. durum]	--	--	--
